# Supplementary material
Source: PubMed Central journal article supplement (PMC3738051)

## Supplementary Online Content

Deyell MW, Buller CE, Miller LH, et al. Impact of National Clinical Guideline Recommendations for Revascularization of Persistently Occluded Infarct-Related Arteries on Clinical Practice in the United States. *Arch Intern Med*. doi:10.1001/archinternmed.2011.315. Published online July 11, 2011.

**eFigure.** Derivation of the study population

This supplementary material has been provided by the authors to give readers additional information about their work.

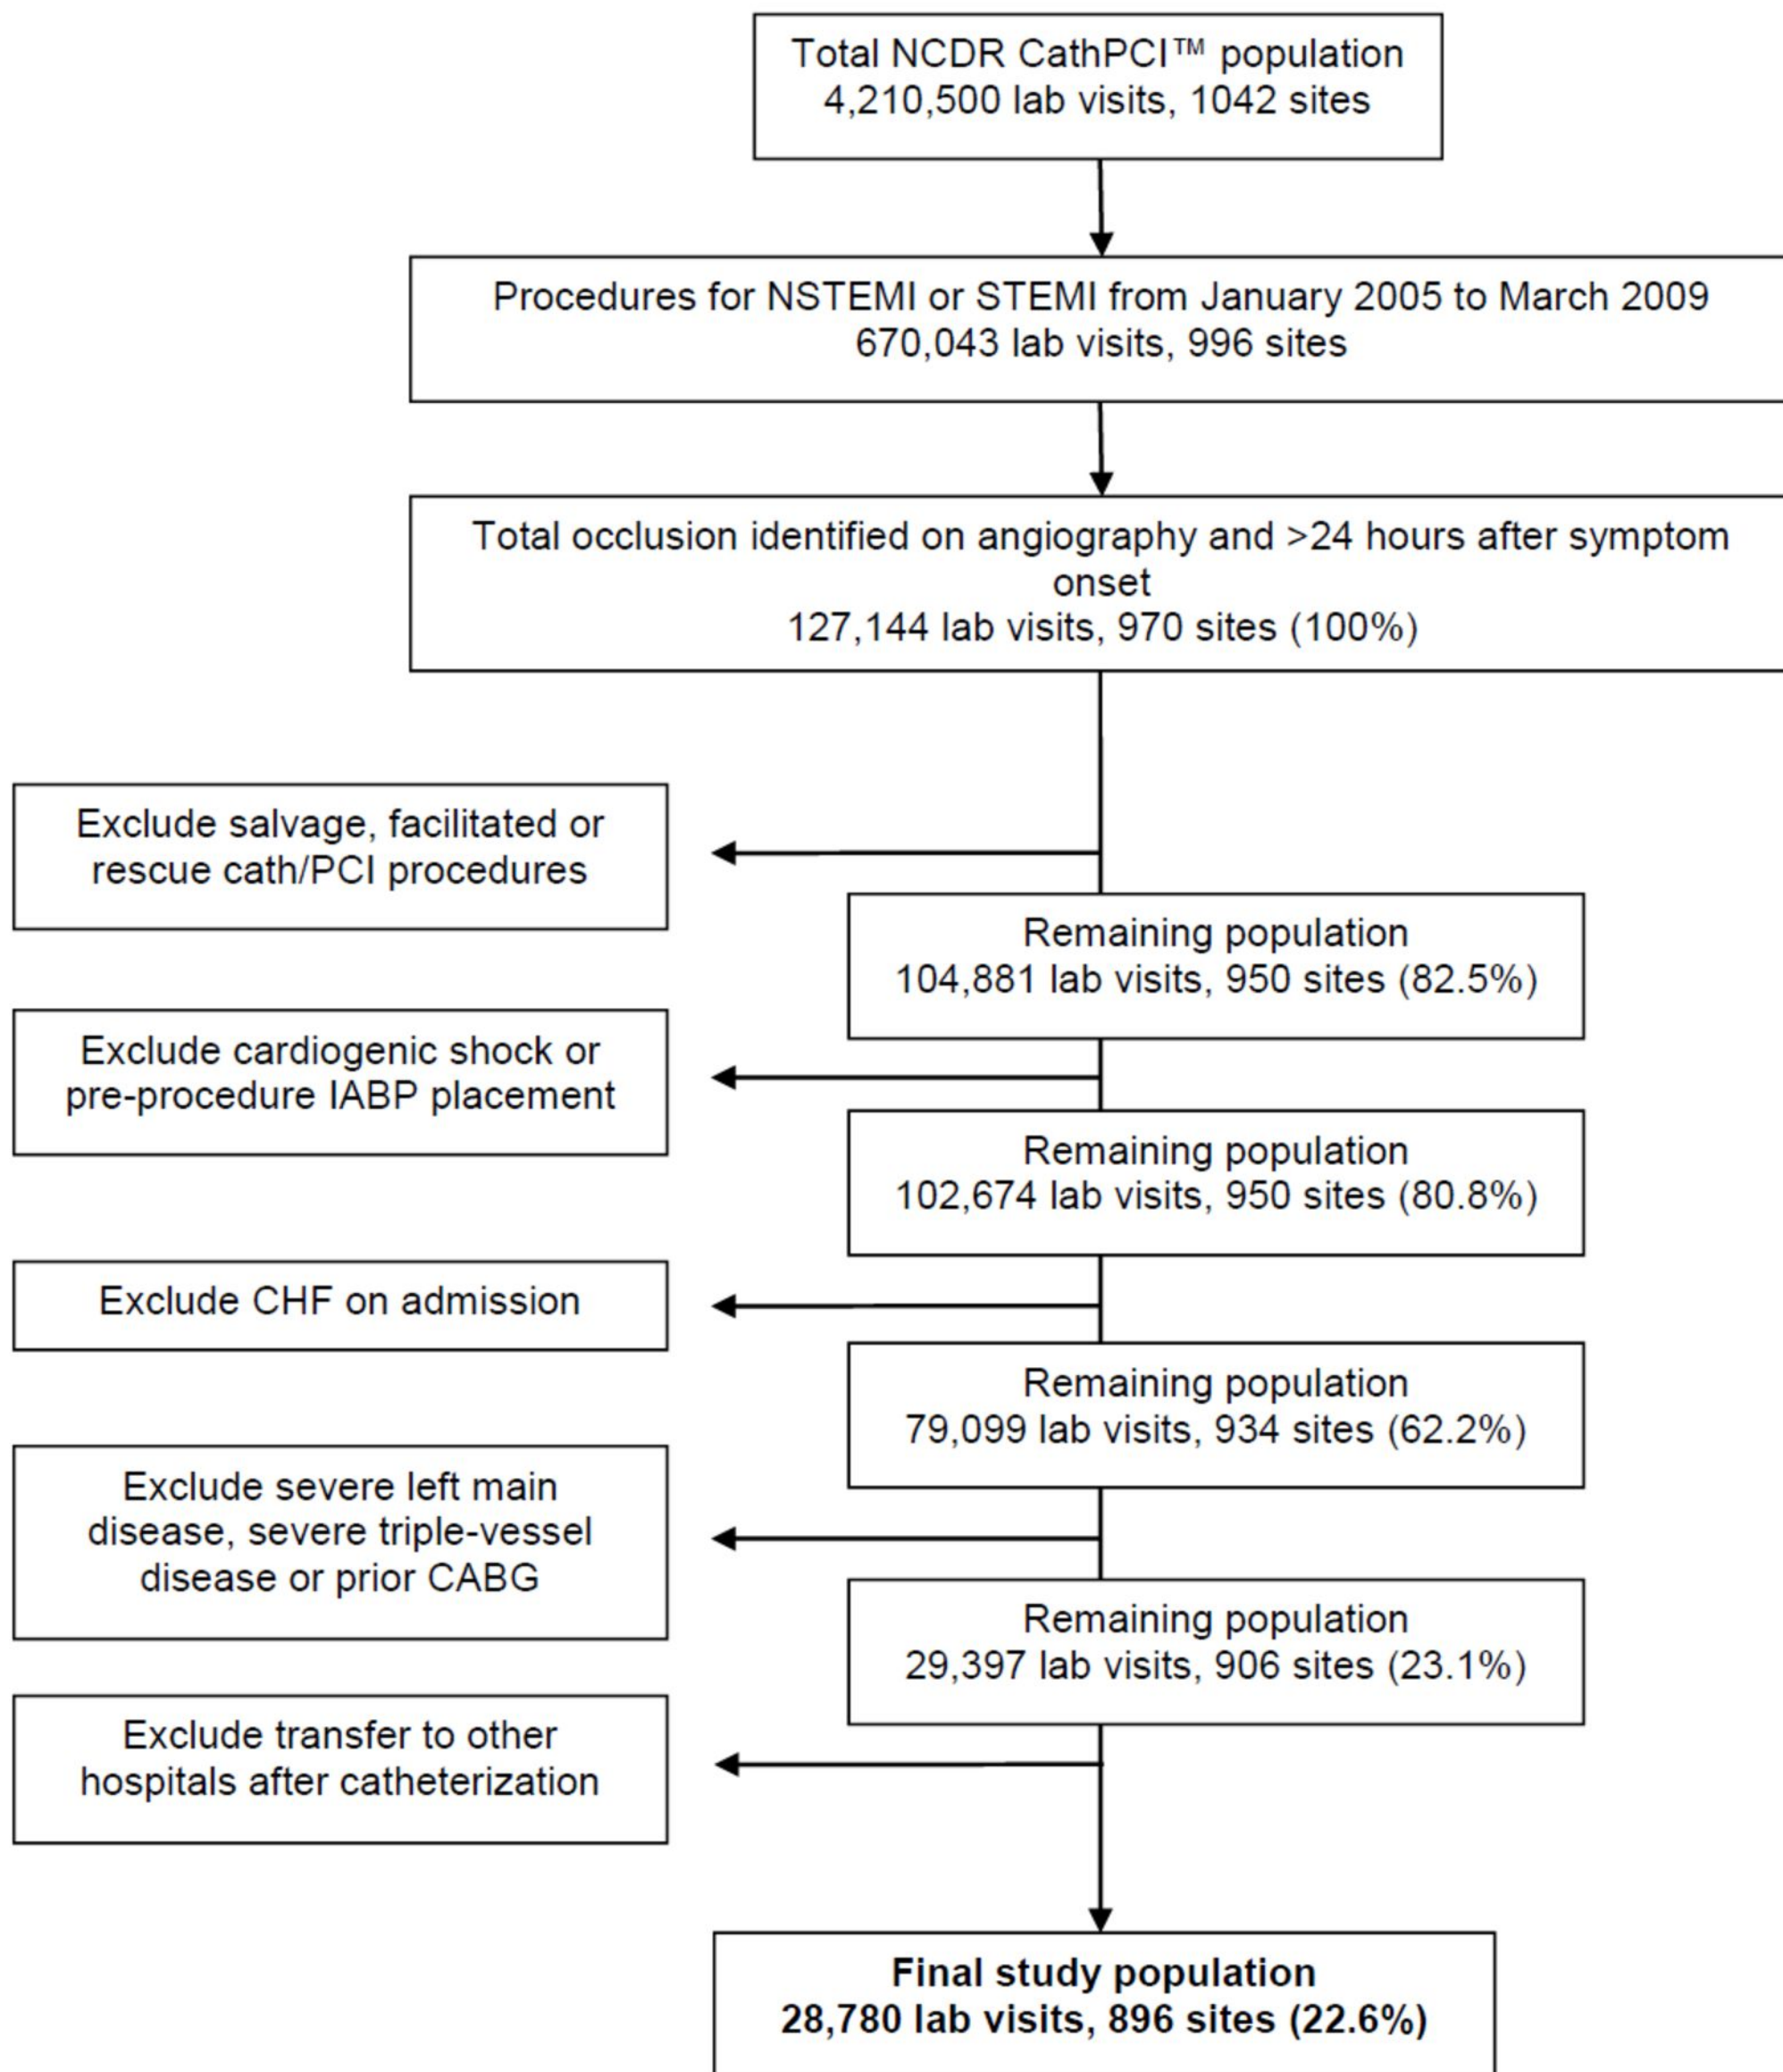

Supplement: NIHMS488566-supplement-eFigure__Derivation_of_the_study_population.pdf [file NIHMS488566-supplement-eFigure__Derivation_of_the_study_population.pdf]
